# Supplementary material
Source: Springer Nature journal article supplement (http://www.springermedizin.de/resource/supplementary/12887_2011_526_MOESM1_ESM.pdf/9475094)
Supplement: MOESM1 [file 9475094]

**Initial ASD Group**  
(Arizona and National)  
n=141; randomized  
into two groups

**Initial Treatment Group**  
(n=72)

**Initial Placebo Group**  
(n=69)

**8 withdrawals/  
removals:**  
2 – med changes  
1- appendectomy  
1 – pre-existing GI  
problem  
1 – 10x dose  
2- behavior  
problems  
1- nausea at lowest  
dose

**11 withdrawals:**  
1- med change  
4- family lost interest  
1- changed school  
1 – behavior problems  
3- loose stools/diarrhea  
1- increased stimming

**Finished Treatment**  
(n=64)

**Finished Placebo**  
(n=58)

11 finished treatment  
but did not complete  
final forms

**Finished Treatment  
and completed forms**  
(n=53)

**Finished Placebo  
and completed forms**  
(n=51)

7 finished study but did  
not complete final  
forms
